# Supplementary material for: IL26, a Noncanonical Mediator of DNA Inflammatory Stimulation, Promotes TNBC Engraftment and Progression in Association with Neutrophils
Source: Oxford University Press journal article supplement (doi:10.1158/0008-5472.can-18-3825), 2020-05-04
Supplement: 00085472can183825-sup-213252_4_supp_6195661_q9kh6b.xlsx [file 00085472can183825-sup-213252_4_supp_6195661_q9kh6b.xlsx]

## Sheet: Sheet1
Supplementary Table 3 - List of significant gene symbols
Gene Symbols identified in either microenvironment in the screen
A2M
BMP1
BMP2
BMP4
BMP5
BMP6
BMP7
BMP8A
BMP8B
CCL11
CCL15
CCL16
CCL17
CCL18
CCL2
CCL20
CCL23
CCL24
CCL27
CCL28
CCL3
CCL7
CCL8
CD70
CNTF
CRLF1
CSF1
CTF1
CTLA4
CXCL1
CXCL2
CXCL5
CXCL9
EGF
FLT1
FLT3
FLT3LG
FLT4
GDF5
GDF7
HGF
IFNA1
IFNA10
IFNA13
IFNA14
IFNA17
IFNA2
IFNA21
IFNA4
IFNA6
IFNA7
IFNA8
IFNB1
IFNE
IFNK
IFNW1
IFNW1
IL13
IL17B
IL17F
IL18
IL1B
IL1F6
IL21
IL22
IL26
IL3
IL5
IL7
IL8
KITLG
LEP
MIF
OSM
PDGFA
PDGFA
PDGFB
PF4
PF4V1
PGF
PPBP
SIRPA
SIRPB1
SIRPB2
SOCS4
SOCS5
SOCS6
TGFA
TGFB1
TGFB2
TGFB3
TLL2
TNFSF10
TNFSF12
TNFSF13
TNFSF13B
TNFSF18
TNFSF4
TNFSF8
TNFSF8
TNFSF9
TSLP
VEGFA
VEGFB
VEGFC
XCL1
XCL2
