# Supplementary material for: IL26, a Noncanonical Mediator of DNA Inflammatory Stimulation, Promotes TNBC Engraftment and Progression in Association with Neutrophils
Source: Oxford University Press journal article supplement (doi:10.1158/0008-5472.can-18-3825), 2020-05-04
Supplement: 00085472can183825-sup-213252_4_supp_6195662_q9kh61.xlsx [file 00085472can183825-sup-213252_4_supp_6195662_q9kh61.xlsx]

## Sheet: Supplemental Table 2 - Signific
Supplementary Table 2 - Significant hits identified in CRISPR screen
ID	Seq	Symbol	RefSeq	GeneID	Descript	Higher.In.Lung.Vs.Lib	Higher.In.Skin.Vs.Lib	LungvsLib.logFC	LungvsLib.adj.P.Val	MFPvsLib.logFC	MFPvsLib.adj.P.Val
TRCN0000415645	TGGATAGAGAGAGCTAATATG	EGF	NM_001963	1950	epidermal growth factor	Lib	Lib	-2.76	0.00242	-1.92	0.0326
TRCN0000371693	TCTAAGGAATATGAGCTTTAT	CCL7	NM_006273	6354	chemokine (C-C motif) ligand 7	Lung		2.94	0.00242	1.3	0.105
TRCN0000430490	GTGATACCACACCTACAATAG	HGF	NM_000601	3082	hepatocyte growth factor (hepapoietin A; scatter factor)	Lib	Lib	-2.67	0.00456	-2.17	0.0289
TRCN0000005843	AGTGGAAGACACTCCTCTGAT	IFNA17	NM_021268	3451	interferon, alpha 17	Lib	Lib	-2.57	0.00514	-2.16	0.0289
TRCN0000003319	CCACAACGAAATCTATGACAA	TGFB1	NM_000660	7040	transforming growth factor, beta 1 (Camurati-Engelmann disease)	Lung		2.65	0.00514	0.751	0.354
TRCN0000318448	CCACAACGAAATCTATGACAA	TGFB1	NM_000660	7040	transforming growth factor, beta 1	Lung		2.65	0.00514	0.751	0.354
TRCN0000057876	GCATCGCCCATGGTTAAGAAA	CXCL2	NM_002089	2920	chemokine (C-X-C motif) ligand 2	Lib	Lib	-2.5	0.00564	-2.02	0.0326
TRCN0000378765	ATGAGACTCAGCCCACCATTT	GDF5	NM_000557	8200	growth differentiation factor 5	Lib	Lib	-2.36	0.00837	-1.64	0.0433
TRCN0000197243	GCCTGTTTGAAGGCATCTACA	FLT3	NM_004119	2322	fms-related tyrosine kinase 3	Lib	Lib	-2.34	0.00938	-1.83	0.0425
TRCN0000358890	CCTGAAACACTACCCAATAAT	TNFSF13B	NM_006573	10673	tumor necrosis factor (ligand) superfamily, member 13b	Lib		-2.42	0.00938	-1.28	0.11
TRCN0000058617	CGCACACATGAATGCAACCAA	BMP6	NM_001718	654	bone morphogenetic protein 6	Lib	Lib	-2.32	0.00946	-1.81	0.0429
TRCN0000358632	CAGTTGCCCTCTGGTTGAGTT	TNFSF13	NM_003808	8741	tumor necrosis factor (ligand) superfamily, member 13	Lib	Lib	-2.36	0.00946	-1.81	0.0429
TRCN0000199669	GCGTTACTGCTTGACCAAAGA	FLT4	NM_002020	2324	fms-related tyrosine kinase 4	Lib	Lib	-2.25	0.0103	-1.66	0.0445
TRCN0000057960	GAAATCCAACACCAGAAATAA	XCL1	NM_002995	6375	chemokine (C motif) ligand 1	Lib	Lib	-2.23	0.0103	-1.79	0.0429
TRCN0000057960	GAAATCCAACACCAGAAATAA	XCL1	NM_002995	6375	chemokine (C motif) ligand 1	Lib	Lib	-2.23	0.0103	-1.79	0.0429
TRCN0000371942	GAGCAGCTGCTCCAGGAATAT	CTF1	NM_001330	1489	cardiotrophin 1	Lib		-2.53	0.0103	-1.64	0.0683
TRCN0000424808	ATACAGGAATATGGTTGTAAG	BMP6	NM_001718	654	bone morphogenetic protein 6	Lung		2.32	0.0103	0.414	0.625
TRCN0000058023	CCACAGTATATTTCCCTGTTT	CXCL9	NM_002416	4283	chemokine (C-X-C motif) ligand 9	Lung		2.44	0.0103	1.44	0.0895
TRCN0000058278	CCAGTGTGAATGCAGACCTAA	VEGFB	NM_003377	7423	vascular endothelial growth factor B	Lib		-2.24	0.0113	-1.02	0.198
TRCN0000418424	ATGATACAAACTCTAACAAAC	TNFSF18	NM_005092	8995	tumor necrosis factor (ligand) superfamily, member 18	Lung		2.43	0.0123	0.626	0.472
TRCN0000057995	CAACACCAGAAATAACATGAT	XCL2	NM_003175	6846	chemokine (C motif) ligand 2	Lib		-2.16	0.0127	-1.55	0.0564
TRCN0000057995	CAACACCAGAAATAACATGAT	XCL2	NM_003175	6846	chemokine (C motif) ligand 2	Lib		-2.16	0.0127	-1.55	0.0564
TRCN0000058629	CGATTCCAGAAGACCGCATAA	IL26	NM_018402	55801	interleukin 26	Lib	Lib	-2.21	0.0135	-1.94	0.0425
TRCN0000003499	GCGCTACTGTGGCTATGAGAA	BMP1	NM_001199	649	bone morphogenetic protein 1	Lib		-2.16	0.0135	-1.51	0.0655
TRCN0000057906	CAGCAGGAGCACATGCCTCAA	CCL24	NM_002991	6369	chemokine (C-C motif) ligand 24	Lib		-2.12	0.0135	-1.53	0.0618
TRCN0000008595	GCAGCTGTGGATGTCCAACAA	IL17B	NM_014443	27190	interleukin 17B	Lib		-2.15	0.0135	-1.61	0.0513
TRCN0000058613	CGCATCTACAAGGACTGTGTT	BMP6	NM_001718	654	bone morphogenetic protein 6	Lib	Lib	-2.16	0.0138	-1.73	0.0462
TRCN0000005801	CCTACAAAGAAGCAGCAATTT	IFNB1	NM_002176	3456	interferon, beta 1, fibroblast	Lib	Lib	-2.04	0.0138	-1.75	0.0429
TRCN0000057993	ACTGCCAGTTAGCAGAATCAA	XCL2	NM_003175	6846	chemokine (C motif) ligand 2	Lib	Lib	-2.04	0.0138	-1.7	0.0429
TRCN0000057993	ACTGCCAGTTAGCAGAATCAA	XCL2	NM_003175	6846	chemokine (C motif) ligand 2	Lib	Lib	-2.04	0.0138	-1.7	0.0429
TRCN0000057917	AGAGTACATCAAGGATCCCAA	CCL16	NM_004590	6360	chemokine (C-C motif) ligand 16	Lib	Lib	-2.1	0.0138	-1.69	0.0474
TRCN0000058631	GCCATCAGTGAACTGGATATT	IL26	NM_018402	55801	interleukin 26	Lib	Lib	-2.12	0.0138	-1.74	0.0429
TRCN0000372635	ATGACTTGGTCCCTGAATTTC	IL21	NM_021803	59067	interleukin 21	Lib	Lib	-2.18	0.0138	-1.88	0.0429
TRCN0000430906	AGGGTGCAGTTAGCATATTAG	BMP8A	NM_181809	353500	bone morphogenetic protein 8a	Lib	Lib	-2.09	0.0138	-1.77	0.0429
TRCN0000052605	GCCCTGGATCACTCGCCAGAA	FLT3LG	NM_001459	2323	fms-related tyrosine kinase 3 ligand	Lib		-2.11	0.0138	-1.36	0.0924
TRCN0000058492	CTACTATGACAGCAGCAACAA	BMP8B	NM_001720	656	bone morphogenetic protein 8b (osteogenic protein 2)	Lib		-2.02	0.0138	-1.31	0.0929
TRCN0000005821	CCTGAATAACAGGAGGACTTT	IFNA14	NM_002172	3448	interferon, alpha 14	Lib		-2.11	0.0138	-1.3	0.106
TRCN0000373189	ACCAGCCTGGAGGTGATCAAG	PF4	NM_002619	5196	platelet factor 4	Lib		-2.31	0.0138	-0.977	0.252
TRCN0000057930	CGGTGTCATCTTCCTAACCAA	CCL3	NM_002983	6348	chemokine (C-C motif) ligand 3	Lib		-2.16	0.0138	-1.03	0.22
TRCN0000315213	CAAGATCCGCAGACGTGTAAA	VEGFA	NM_003376	7422	vascular endothelial growth factor A	Lib		-2.19	0.0138	-1.56	0.0667
TRCN0000005829	GCAATGATCCTGATTGACTAA	IFNA7	NM_021057	3444	interferon, alpha 7	Lib		-2.18	0.0138	-1.61	0.0633
TRCN0000413061	AGGTACAACACTGGCCATTTC	BMP8A	NM_181809	353500	bone morphogenetic protein 8a	Lib		-2.25	0.0138	-0.939	0.259
TRCN0000059173	GCATACCAGATAGAGGAGTTA	CNTF	NM_000614	1270	ciliary neurotrophic factor	Lung		2.18	0.0138	0.353	0.695
TRCN0000052756	GCACGTGAACATCTCCCAATT	SIRPB2	XM_209363	284759	signal-regulatory protein beta 2	Lung		2.1	0.0138	0.324	0.708
TRCN0000001894	CCACACACAGATTGATTACAT	SOCS5	NM_014011	9655	suppressor of cytokine signaling 5	Lib	Lib	-1.97	0.0139	-1.76	0.0429
TRCN0000058675	GCAATTCATTTCCTGTAGAAT	IFNK	NM_020124	56832	interferon, kappa	Lung	Skin	2.35	0.0139	1.98	0.0433
TRCN0000005812	CCAGCAGACCTTCAATCTCTT	IFNA21	NM_002175	3452	interferon, alpha 21	Lung		2.14	0.0139	0.792	0.334
TRCN0000039575	CGCTCCTTTGATGATCTCCAA	PDGFB	NM_002608	5155	platelet-derived growth factor beta polypeptide (simian sarcoma viral (v-sis) oncogene homolog)	Lung		2.3	0.0139	1.11	0.215
TRCN0000310324	CGCTCCTTTGATGATCTCCAA	PDGFB	NM_002608	5155	platelet-derived growth factor beta polypeptide (simian sarcoma viral (v-sis) oncogene homolog)	Lung		2.3	0.0139	1.11	0.215
TRCN0000057897	GCTGTAATCTTCAAGACCAAA	CCL7	NM_006273	6354	chemokine (C-C motif) ligand 7	Lung		2.07	0.0162	0.999	0.22
TRCN0000054148	GCCGATAAGAAGATGTGTGAA	TLL2	NM_012465	7093	tolloid-like 2	Lung		2.14	0.0162	1.46	0.0901
TRCN0000371687	TCCACAGCTACCTCTTCTATG	CCL3	NM_002983	6348	chemokine (C-C motif) ligand 3	Lib		-2.06	0.0163	-1.03	0.213
TRCN0000057894	CCAGGACTTTATGAAGCACCT	CCL7	NM_006273	6354	chemokine (C-C motif) ligand 7	Lib		-2.05	0.0163	-1.46	0.0838
TRCN0000006373	CCACGATTTCAAGACTTGTTA	TGFA	NM_003236	7039	transforming growth factor, alpha	Lung		2.29	0.0163	1.64	0.081
TRCN0000058993	CCAACCTATTCCGAGCAGAAT	TGFB3	NM_003239	7043	transforming growth factor, beta 3	Lung		2.28	0.0163	1.34	0.137
TRCN0000007843	GAAACACTGATGAGACCTTCT	CD70	NM_001252	970	tumor necrosis factor (ligand) superfamily, member 7	Lib	Lib	-1.86	0.0169	-1.72	0.0429
TRCN0000005858	CCTGGCACAAATGAGCAGAAT	IFNA6	NM_021002	3443	interferon, alpha 6	Lib	Lib	-2.12	0.0169	-1.94	0.0429
TRCN0000371431	ATGCCACCAACCACGCTATAG	BMP5	NM_021073	653	bone morphogenetic protein 5	Lib		-2.38	0.0169	-1.44	0.134
TRCN0000006654	CCATAGTGAAAGTCTATGATT	A2M	NM_000014	2	alpha-2-macroglobulin	Lung		2.03	0.0169	0.752	0.363
TRCN0000058387	CACATGGGATAACGAGGCTTA	IL1B	NM_000576	3553	interleukin 1, beta	Lung		2.33	0.0169	1.7	0.0794
TRCN0000000640	TGCGAATACCTGTCCTACGAT	FLT4	NM_002020	2324	fms-related tyrosine kinase 4	Lung		2.18	0.0169	0.938	0.28
TRCN0000056819	CTACATCAACTATTACGACAT	MIF	NM_002415	4282	macrophage migration inhibitory factor (glycosylation-inhibiting factor)	Lung		2.07	0.0169	1.52	0.0793
TRCN0000039576	CCAGGTGAGAAAGATCGAGAT	PDGFB	NM_002608	5155	platelet-derived growth factor beta polypeptide (simian sarcoma viral (v-sis) oncogene homolog)	Lung		2.02	0.0169	1.02	0.214
TRCN0000298818	CCAGGTGAGAAAGATCGAGAT	PDGFB	NM_002608	5155	platelet-derived growth factor beta polypeptide (simian sarcoma viral (v-sis) oncogene homolog)	Lung		2.02	0.0169	1.02	0.214
TRCN0000058049	GTTAAATACCTGCAAAGCCTT	CCL17	NM_002987	6361	chemokine (C-C motif) ligand 17	Lung		2.03	0.0169	1.56	0.0683
TRCN0000054150	CGGTCAGATTCAATCTCCCAA	TLL2	NM_012465	7093	tolloid-like 2	Lung		2.3	0.0169	1.59	0.091
TRCN0000422906	CAAGCCGTTGCACGTGGACTT	GDF7	NM_182828	151449	growth differentiation factor 7	Lung		2.27	0.0169	1.36	0.137
TRCN0000373826	CCATCTTTATTATGGTCATAT	TSLP	NM_033035	85480	thymic stromal lymphopoietin	Lung		1.92	0.0177	0.0326	0.981
TRCN0000058353	CCTTCCAGAAACGTGATCCAA	LEP	NM_000230	3952	leptin (obesity homolog, mouse)	Lung	Skin	2.23	0.018	2.18	0.0425
TRCN0000005870	TGAGACCCTTCTAGATGAATT	IFNA8	NM_002170	3445	interferon, alpha 8	Lung		2.06	0.0191	1.3	0.129
TRCN0000005880	CCACTATCTTCTCTCTAGATT	IFNE	NM_176891	338376	interferon epsilon 1	Lung		1.93	0.0195	0.512	0.536
TRCN0000058562	CCTTTGACTGACACAGGCCAT	CSF1	NM_000757	1435	colony stimulating factor 1 (macrophage)	Lung		2.01	0.0201	0.91	0.268
TRCN0000057951	GAGCTACACAAGAATCACCAA	CCL8	NM_005623	6355	chemokine (C-C motif) ligand 8	Lung		2.26	0.0201	1.15	0.222
TRCN0000057938	CCTGCCCTTATAGGAACAGAA	CXCL1	NM_001511	2919	chemokine (C-X-C motif) ligand 1 (melanoma growth stimulating activity, alpha)	Lib		-1.99	0.0204	-1.5	0.0818
TRCN0000412349	GTAACCTCTACAGGCATTTAA	CNTF	NM_000614	1270	ciliary neurotrophic factor	Lib	Lib	-1.97	0.0206	-1.73	0.0474
TRCN0000371614	AGTGATCTTCACCACCAAGAA	CCL24	NM_002991	6369	chemokine (C-C motif) ligand 24	Lib		-1.95	0.0206	-1.68	0.0513
TRCN0000058691	GCAGAACAACTCAGTCATCAT	TNFSF4	NM_003326	7292	tumor necrosis factor (ligand) superfamily, member 4 (tax-transcriptionally activated glycoprotein 1, 34kDa)	Lib	Lib	-1.89	0.0207	-1.74	0.0429
TRCN0000058915	TGAGCTACAAAGAGGACACGA	TNFSF9	NM_003811	8744	tumor necrosis factor (ligand) superfamily, member 9	Lib	Lib	-1.77	0.0211	-1.65	0.0429
TRCN0000058194	GATCATCTGAACTCCACTAAT	BMP2	NM_001200	650	bone morphogenetic protein 2	Lib		-1.9	0.0211	-1.54	0.0683
TRCN0000371615	TGTCTGTGCCCACCACATCAT	CCL24	NM_002991	6369	chemokine (C-C motif) ligand 24	Lib		-1.91	0.0211	-1.01	0.219
TRCN0000059147	GATGAGTATGATAAGGTGGTA	BMP4	NM_001202	652	bone morphogenetic protein 4	Lung		2.05	0.0211	1.46	0.0974
TRCN0000057941	CGGAAAGCTTGCCTCAATCCT	CXCL1	NM_001511	2919	chemokine (C-X-C motif) ligand 1 (melanoma growth stimulating activity, alpha)	Lung		1.91	0.0211	0.281	0.759
TRCN0000058053	TGATCGGGAAAGGAACCCATT	PPBP	NM_002704	5473	pro-platelet basic protein (chemokine (C-X-C motif) ligand 7)	Lung		1.99	0.0211	1.59	0.0703
TRCN0000057963	GACCGTATTCTTCATCCTAAA	CCL20	NM_004591	6364	chemokine (C-C motif) ligand 20	Lung		2.15	0.0211	1.08	0.23
TRCN0000057071	CCACCGACAATGCTTTGTGTA	SOCS4	NM_080867	122809	suppressor of cytokine signaling 4	Lung		2.15	0.0211	1.45	0.114
TRCN0000371683	CCGAAAGCCACTCTCAGACAA	CCL27	NM_006664	10850	chemokine (C-C motif) ligand 27	Lung		2.2	0.0221	1.01	0.275
TRCN0000058628	GCAGAAATTGAGCCACTGTAT	IL26	NM_018402	55801	interleukin 26	Lib		-1.94	0.0228	-1.13	0.174
TRCN0000005503	GAGCACTCAAATGGTAGGTTT	SOCS6	NM_004232	9306	suppressor of cytokine signaling 6	Lung		1.82	0.0228	-0.0241	0.988
TRCN0000371622	TTAGAGAGTCTACAGATAAAT	CCL28	NM_148672	56477	chemokine (C-C motif) ligand 28	Lung		2.11	0.0228	0.675	0.461		97
TRCN0000029802	CTGTGCTATGACGTCCCTGAT	SIRPB1	NM_006065	10326	signal-regulatory protein beta 1	Lung		2.07	0.0229	1.3	0.143
TRCN0000157341	CTGAATCCGGATTATCGGGAA	PDGFA	NM_033023	5154	platelet-derived growth factor alpha polypeptide	Lung		1.8	0.0229	0.558	0.476
TRCN0000005830	CCTGGGACAAATGGGAAGAAT	IFNA10	NM_002171	3446	interferon, alpha 10	Lib		-1.87	0.0241	-1.08	0.186
TRCN0000058962	GACTGGATCATCGCGCCTGAA	BMP7	NM_001719	655	bone morphogenetic protein 7 (osteogenic protein 1)	Lung		1.95	0.0241	0.972	0.246
TRCN0000230834	ACTCGTGGCTACTCGTTAATT	FLT1	NM_002019	2321	fms-related tyrosine kinase 1 (vascular endothelial growth factor/vascular permeability factor receptor)	Lung		1.99	0.0241	1.43	0.102
TRCN0000057903	CCTGCTGCATGTTCTTTGTTT	CCL24	NM_002991	6369	chemokine (C-C motif) ligand 24	Lung	Skin	1.91	0.0246	1.87	0.0429
TRCN0000057955	GAAATACATCAGCGACCTGAA	CCL18	NM_002988	6362	chemokine (C-C motif) ligand 18 (pulmonary and activation-regulated)	Lung		2.03	0.0259	1.54	0.091
TRCN0000005926	CGACAAACAAATGGTCCAATA	TNFSF10	NM_003810	8743	tumor necrosis factor (ligand) superfamily, member 10	Lung	Skin	2.02	0.0261	2.13	0.0425
TRCN0000005926	CGACAAACAAATGGTCCAATA	TNFSF10	NM_003810	8743	tumor necrosis factor (ligand) superfamily, member 10	Lung	Skin	2.02	0.0261	2.13	0.0425
TRCN0000058575	CCAGTTTGTAAAGGACCTGCT	IL13	NM_002188	3596	interleukin 13	Lung		1.99	0.0262	1.26	0.148
TRCN0000059006	CACCATAGACTTGATATTCAA	TNFSF18	NM_005092	8995	tumor necrosis factor (ligand) superfamily, member 18	Lung		1.99	0.0266	1.68	0.0683
TRCN0000003307	CAGACCAATGTGCTAATAGAT	HGF	NM_000601	3082	hepatocyte growth factor (hepapoietin A; scatter factor)	Lung		1.77	0.0279	-0.0163	0.991
TRCN0000058240	CTCAGCACGTTCGCTGCGAAT	PGF	NM_002632	5228	placental growth factor, vascular endothelial growth factor-related protein	Lung		2.11	0.0279	1.16	0.22
TRCN0000057932	GAAATATGTCAGCGACCTAGA	CCL3	NM_002983	6348	chemokine (C-C motif) ligand 3	Lung		1.87	0.0279	0.725	0.394
TRCN0000058914	CCCTTCACCGAGGTCGGAATA	TNFSF9	NM_003811	8744	tumor necrosis factor (ligand) superfamily, member 9	Lung		1.95	0.0279	1.3	0.135
TRCN0000057871	GAGAAAGATTGGTCCTCAGAT	CCL23	NM_005064	6368	chemokine (C-C motif) ligand 23	Lung		2.01	0.0279	1.58	0.0875
TRCN0000157845	CACAAGCCTGAATCCGGATTA	PDGFA	NM_033023	5154	platelet-derived growth factor alpha polypeptide	Lung		2.12	0.0279	1.42	0.135
TRCN0000358631	CCCAACAAACAGAGCTGCAGA	TNFSF13	NM_003808	8741	tumor necrosis factor (ligand) superfamily, member 13	Lung		1.93	0.0284	0.857	0.322
TRCN0000059238	CCACCCAAAGAATTCCTAGAA	IL21	NM_021803	59067	interleukin 21	Lung		2	0.029	1.05	0.235
TRCN0000158199	CATTCGGAGGAAGAGAAGCAT	PDGFA	NM_033023	5154	platelet-derived growth factor alpha polypeptide	Lung		2.03	0.0293	1.51	0.104
TRCN0000159480	CTGACACATCACAATTTCATA	PF4V1	NM_002620	5197	platelet factor 4 variant 1	Lung		1.74	0.03	0.0869	0.938
TRCN0000373165	GGACCGACTTTCCATTGATTC	OSM	NM_020530	5008	oncostatin M	Lib		-1.83	0.0304	-1.33	0.115
TRCN0000006282	GCTGTGATCTTCAAGACCATT	CCL2	NM_002982	6347	chemokine (C-C motif) ligand 2	Lung		1.75	0.0304	0.933	0.234
TRCN0000057934	GATCAGTAATCTGCAAGTGTT	CXCL5	NM_002994	6374	chemokine (C-X-C motif) ligand 5	Lung		1.97	0.0304	1.29	0.147
TRCN0000327745	GATCAGTAATCTGCAAGTGTT	CXCL5	NM_002994	6374	chemokine (C-X-C motif) ligand 5	Lung		1.97	0.0304	1.29	0.147
TRCN0000058545	GACCAAGACATTCTGATGGAA	IL3	NM_000588	3562	interleukin 3 (colony-stimulating factor, multiple)	Lung		2.04	0.0305	1.3	0.164
TRCN0000005817	CCTGAAGGACAGACATGATTT	IFNA4	NM_021068	3441	interferon, alpha 4	Lib		-1.69	0.0308	-1.46	0.069
TRCN0000058615	GCGACACCACAAAGAGTTCAA	BMP6	NM_001718	654	bone morphogenetic protein 6	Lung		1.79	0.0316	0.449	0.603
TRCN0000059176	GCTGCCTTTGCATACCAGATA	CNTF	NM_000614	1270	ciliary neurotrophic factor	Lib		-1.82	0.0319	-1.28	0.13
TRCN0000061487	GATTTCCTCTTTCAAGCCAAA	CRLF1	NM_004750	9244	cytokine receptor-like factor 1	Lung		1.89	0.0321	1.78	0.0529
TRCN0000005820	CTGGGCTGTAATCTGTCTCAA	IFNA14	NM_002172	3448	interferon, alpha 14	Lib		-1.77	0.0336	-1.15	0.16
TRCN0000315232	AGGCGAGGCAGCTTGAGTTAA	VEGFA	NM_003376	7422	vascular endothelial growth factor A	Lung		1.92	0.0336	1.3	0.143
TRCN0000056726	CACAGCTGTTTCTTTGAGCAA	CTLA4	NM_005214	1493	cytotoxic T-lymphocyte-associated protein 4	Lung		1.97	0.0336	1.34	0.143
TRCN0000059025	CCTGTTTCAAGACGTGACTTT	TNFSF13	NM_003808	8741	tumor necrosis factor (ligand) superfamily, member 13	Lung		1.68	0.0338	0.31	0.722
TRCN0000057865	GCTGTGATCTTCAAGACCAAA	CCL11	NM_002986	6356	chemokine (C-C motif) ligand 11	Lung		2.12	0.0343	1.81	0.077
TRCN0000058877	CTCCAGTCACTATTGCCTTAA	IL1F6	NM_014440	27179	interleukin 1 family, member 6 (epsilon)	Lung		1.9	0.0345	1.51	0.0948
TRCN0000058054	TGCAACCAAGTCGAAGTGATA	PPBP	NM_002704	5473	pro-platelet basic protein (chemokine (C-X-C motif) ligand 7)	Lung		1.89	0.0347	1.34	0.134
TRCN0000008593	CCAGAGAAAGTGTGAGGTCAA	IL17B	NM_014443	27190	interleukin 17B	Lung		1.81	0.0355	0.647	0.456
TRCN0000058597	CTCCATGAATTCCGTTCCCAT	IL17F	NM_052872	112744	interleukin 17F	Lung		1.96	0.0355	1.55	0.0974
TRCN0000052754	CGGGAGGCCATTTACAACTTT	SIRPB2	XM_209363	284759	signal-regulatory protein beta 2	Lung		1.81	0.0355	0.909	0.28
TRCN0000058397	GTTCGACGTGTCCAGCCTTAA	GDF7	NM_182828	151449	growth differentiation factor 7	Lib		-1.66	0.0359	-1.46	0.0705
TRCN0000149199	GCTGCTCCTATTTAATCCTCT	KITLG	NM_003994	4254	KIT ligand	Lung		1.91	0.0371	1.08	0.23
TRCN0000005875	GCAAGAAAGATTAAGGAGGAA	IFNA1	NM_024013	3439	interferon, alpha 1	Lung		1.84	0.0371	1.2	0.169
TRCN0000002684	CCCAACAACCACACGGAGTAT	SIRPA	NM_080792	140885	signal-regulatory protein alpha	Lung		1.85	0.0371	0.827	0.347
TRCN0000371623	TTCGATTTCACAGTGTGTTTG	CCL3	NM_002983	6348	chemokine (C-C motif) ligand 3	Lung		1.97	0.0374	1.27	0.174
TRCN0000056724	CCGCCATACTACCTGGGCATA	CTLA4	NM_005214	1493	cytotoxic T-lymphocyte-associated protein 4	Lung		1.71	0.0374	0.322	0.722
TRCN0000057964	CGAATCAGAAGCAGCAAGCAA	CCL20	NM_004591	6364	chemokine (C-C motif) ligand 20	Lib		-1.67	0.0376	-1.22	0.131
TRCN0000058745	GATACTTTCTAGCTTGTGAAA	IL18	NM_001562	3606	interleukin 18 (interferon-gamma-inducing factor)	Lung		1.85	0.0376	1.14	0.201
TRCN0000371944	TGTCTGTCTGTCTGCTCTTAG	CTF1	NM_001330	1489	cardiotrophin 1	Lib		-1.72	0.0382	-1.59	0.0659
TRCN0000005807	ACATGCAAGAAAGACTGAGAA	IFNW1	NM_002177	3467	interferon, omega 1	Lung		1.87	0.0382	0.453	0.635
TRCN0000033428	CACACTCGATATGGACCAGTT	TGFB2	NM_003238	7042	transforming growth factor, beta 2	Lung		1.68	0.0382	0.62	0.449
TRCN0000005861	CTAGACAAATTCTGCACCGAA	IFNA13	NM_006900	3447	interferon, alpha 13	Lib		-1.7	0.0402	-1.4	0.0956
TRCN0000058996	GCTGTTGAGAAGAGAGTCCAA	TGFB3	NM_003239	7043	transforming growth factor, beta 3	Lung		1.77	0.041	0.8	0.355
TRCN0000371685	TCAACGCAGCATCTGCATCCA	CCL27	NM_006664	10850	chemokine (C-C motif) ligand 27	Lib		-1.65	0.0421	-1.31	0.107
TRCN0000005808	CCTACTTAGCAGGAACACCTT	IFNW1	NM_002177	3467	interferon, omega 1	Lung		1.8	0.0421	0.916	0.291
TRCN0000005864	CCATGAGATGATCCAGCAGAT	IFNA2	NM_000605	3440	interferon, alpha 2	Lung		1.78	0.0424	0.473	0.603
TRCN0000058734	GCAAGAGTTTCTTGGTGTAAT	IL5	NM_000879	3567	interleukin 5 (colony-stimulating factor, eosinophil)	Lung		1.97	0.0431	1.82	0.0695
TRCN0000005802	CGCATTGACCATCTATGAGAT	IFNB1	NM_002176	3456	interferon, beta 1, fibroblast	Lung		1.7	0.0431	1.49	0.0841
TRCN0000371677	GAAGCTGGACACACGGATCAA	CCL23	NM_005064	6368	chemokine (C-C motif) ligand 23	Lung		1.88	0.0434	0.756	0.423
TRCN0000010546	GCATCCCAGTCAATCAGCTTT	FLT3	NM_004119	2322	fms-related tyrosine kinase 3	Lung		1.96	0.0443	1.86	0.0683
TRCN0000256731	ACAACGGCATCCAGCGATTTC	FLT4	NM_002020	2324	fms-related tyrosine kinase 4	Lung		1.7	0.0454	0.947	0.254
TRCN0000195141	CGCTATTTCTTCTACTGCTAT	FLT4	NM_002020	2324	fms-related tyrosine kinase 4	Lung		1.82	0.0454	1.55	0.0924
TRCN0000308204	TCCTACGTGGAGCTGACGTTC	PGF	NM_002632	5228	placental growth factor	Lib		-1.67	0.0461	-1.44	0.0901
TRCN0000371602	CCTTCAACTCTTCGTACATTC	CCL18	NM_002988	6362	chemokine (C-C motif) ligand 18 (pulmonary and activation-regulated)	Lung		1.85	0.0461	1.26	0.169
TRCN0000057886	GCTGAAGCCCTACTCAATATA	CCL15	NM_004167	6359	chemokine (C-C motif) ligand 15	Lib	Lib	-1.6	0.0465	-1.74	0.0433
TRCN0000058028	CCGAACTTTAATTTCAGGAAT	IL8	NM_000584	3576	interleukin 8	Lung	Skin	1.68	0.0465	1.83	0.0433
TRCN0000058149	GCAGCCCATTATGAAGTTCAT	TNFSF12	NM_153012	8742	tumor necrosis factor (ligand) superfamily, member 12	Lib		-1.76	0.0465	-1.67	0.0683
TRCN0000057935	CGGGAAGGAAATTTGTCTTGA	CXCL5	NM_002994	6374	chemokine (C-X-C motif) ligand 5	Lung		1.84	0.0465	1.15	0.216
TRCN0000327671	CGGGAAGGAAATTTGTCTTGA	CXCL5	NM_002994	6374	chemokine (C-X-C motif) ligand 5	Lung		1.84	0.0465	1.15	0.216
TRCN0000003343	AGGGCAGAATCATCACGAAGT	TGFB1	NM_000660	7040	transforming growth factor, beta 1 (Camurati-Engelmann disease)	Lib	Lib	-1.67	0.049	-1.84	0.0429
TRCN0000059184	CGATCAATTATTGGACAGCAT	IL7	NM_000880	3574	interleukin 7	Lib		-1.68	0.049	-0.748	0.383
TRCN0000058956	GCTGAACTTCACCCTTGAAGA	IL22	NM_020525	50616	interleukin 22	Lib		-1.67	0.049	-1.2	0.152
TRCN0000058503	CGCGACAAACACCTTCTTTAA	VEGFC	NM_005429	7424	vascular endothelial growth factor C	Lung	Skin	1.76	0.0499	1.96	0.0429
TRCN0000058165	CTCATCAACAAGCATATCAAA	TNFSF8	NM_001244	944	tumor necrosis factor (ligand) superfamily, member 8	Lib		-1.62	0.0499	-0.967	0.234
TRCN0000427698	CAAACTACACAGGGTATTAAA	TNFSF8	NM_001244	944	tumor necrosis factor (ligand) superfamily, member 8	Lib		-1.62	0.0499	-1.44	0.0875
TRCN0000057977	CCCGCACAACCATACTGTTAA	CCL28	NM_019846	56477	chemokine (C-C motif) ligand 28	Lib		-1.56	0.0499	-1.1	0.167
TRCN0000057070	GCTAGAATTGAACAGTGGAAT	SOCS4	NM_080867	122809	suppressor of cytokine signaling 4	Lung		1.76	0.0499	1.22	0.172
TRCN0000156591	GAATCCGGATTATCGGGAAGA	PDGFA	NM_033023	5154	platelet-derived growth factor alpha polypeptide		Lib	-1.53	0.0555	-1.71	0.0473
TRCN0000058758	CCAAGAATTATTCTGGACGTT	IL12B	NM_002187	3593	interleukin 12B (natural killer cell stimulatory factor 2, cytotoxic lymphocyte maturation factor 2, p40)		Skin	1.54	0.0555	2.15	0.0326
TRCN0000371620	TTCGTGCTTCACCTGGCTCAA	CCL27	NM_006664	10850	chemokine (C-C motif) ligand 27		Skin	1.81	0.0555	2.12	0.0429
TRCN0000058811	CTTCTCCTAACTGCAAGGCTA	THPO	NM_000460	7066	thrombopoietin (myeloproliferative leukemia virus oncogene ligand, megakaryocyte growth and development factor)		Skin	1.72	0.0573	2.51	0.0289
TRCN0000118188	CCTCATACTTATCCAAGAAAT	PDGFC	NM_016205	56034	platelet derived growth factor C		Skin	1.43	0.0625	1.95	0.0363
TRCN0000331695	CCTCATACTTATCCAAGAAAT	PDGFC	NM_016205	56034	platelet derived growth factor C		Skin	1.43	0.0625	1.95	0.0363
TRCN0000033615	GTGCAAATAAGGGCTGCTGTT	TFF1	NM_003225	7031	trefoil factor 1 (breast cancer, estrogen-inducible sequence expressed in)		Skin	1.65	0.0644	1.96	0.0447
TRCN0000058041	CCTGTTAATCCAAGGTCTTTA	CXCL10	NM_001565	3627	chemokine (C-X-C motif) ligand 10		Skin	1.48	0.0658	1.76	0.0455
TRCN0000058175	GTTCACACAAAGATCTTCTTT	IL1F7	NM_173204	27178	interleukin 1 family, member 7 (zeta)		Skin	1.67	0.0736	2.15	0.0429			80
TRCN0000425238	CTACCTCAGCAAGACGTTATT	VEGFC	NM_005429	7424	vascular endothelial growth factor C		Skin	1.61	0.0779	2.61	0.0289
TRCN0000003500	CGCCCAACTACCCAGACGATT	BMP1	NM_001199	649	bone morphogenetic protein 1		Skin	1.46	0.0795	2.04	0.0425
TRCN0000058356	CATCCTGACCTTATCCAAGAT	LEP	NM_000230	3952	leptin (obesity homolog, mouse)		Skin	1.53	0.0816	2.09	0.0429
TRCN0000059210	CGTGATTCTAAGAATCTCAAA	IL1A	NM_000575	3552	interleukin 1, alpha		Skin	1.55	0.0825	2.02	0.0429
TRCN0000005828	CAGAGAAGAAATACAGCCCTT	IFNA7	NM_021057	3444	interferon, alpha 7		Skin	1.41	0.0845	1.84	0.0433
TRCN0000057848	CCAGGACTATATCAAGGACAT	CCL14	NM_004166	6358	chemokine (C-C motif) ligand 14		Skin	1.51	0.0875	2.09	0.0429
TRCN0000058645	GAACAATCACTGCTGACACTT	EPO	NM_000799	2056	erythropoietin		Lib	-1.29	0.089	-1.64	0.0485
TRCN0000033427	CCAAGATTGAACAGCTTTCTA	TGFB2	NM_003238	7042	transforming growth factor, beta 2		Skin	1.52	0.0916	2.09	0.0429
TRCN0000147029	CACAGTGTGTTTGTGATTGTT	CCL3L3	NM_001001437	414062	chemokine (C-C motif) ligand 3-like 3		Skin	1.34	0.101	2.41	0.0289
TRCN0000059129	CCTCTCACCATTAACAGGATT	IL16	NM_004513	3603	interleukin 16 (lymphocyte chemoattractant factor)		Skin	1.45	0.102	2	0.0461
TRCN0000059029	CCTGCACCATATCCTCTCCCA	IL28B	NM_172139	282617	interleukin 28B (interferon, lambda 3)		Skin	1.38	0.109	1.91	0.0479
TRCN0000057918	CCTCAAGTACAGCCAAAGGAA	CCL21	NM_002989	6366	chemokine (C-C motif) ligand 21		Skin	1.36	0.119	2.64	0.0289
TRCN0000003318	CCGGCCTTTCCTGCTTCTCAT	TGFB1	NM_000660	7040	transforming growth factor, beta 1 (Camurati-Engelmann disease)		Skin	1.38	0.128	2.35	0.0425
TRCN0000349551	CCGGCCTTTCCTGCTTCTCAT	TGFB1	NM_000660	7040	transforming growth factor, beta 1		Skin	1.38	0.128	2.35	0.0425
TRCN0000058499	CATTCAGATGTAGCGGATAAT	IFNG	NM_000619	3458	interferon, gamma		Skin	1.17	0.136	2.5	0.0289
TRCN0000057980	CCTCATGCTAGTAGCTGCCTT	CCL4	NM_002984	6351	chemokine (C-C motif) ligand 4		Skin	1.19	0.136	1.87	0.0429
TRCN0000029800	TCCTAGTCCTTTCCTGCTGAT	SIRPB1	NM_006065	10326	signal-regulatory protein beta 1		Skin	1.31	0.138	2.57	0.0289
TRCN0000158260	CAGGACGGTCATTTACGAGAT	PDGFA	NM_033023	5154	platelet-derived growth factor alpha polypeptide		Skin	1.33	0.138	2.1	0.0429
TRCN0000059207	CAGAACGAATTGACAAACAAA	IL6	NM_000600	3569	interleukin 6 (interferon, beta 2)		Skin	1.26	0.14	2.22	0.0425
TRCN0000000773	GCTAACTTCTACAAACTGATT	FLT3	NM_004119	2322	fms-related tyrosine kinase 3		Skin	1.22	0.143	2.16	0.0425
TRCN0000058051	GAGAGTGAAGAATGCAGTTAA	CCL17	NM_002987	6361	chemokine (C-C motif) ligand 17		Skin	1.2	0.147	2.01	0.0429
TRCN0000057913	TCCTTATCATTACTTCGGCTT	CCL16	NM_004590	6360	chemokine (C-C motif) ligand 16		Skin	1.29	0.147	2.27	0.0425
TRCN0000058577	CCTGCTCTTACATTTAAAGAA	IL13	NM_002188	3596	interleukin 13		Skin	1.17	0.152	2.26	0.0326
TRCN0000059180	CCTTCTGTCTTTATGGAAATT	CRLF2	NM_022148	64109	cytokine receptor-like factor 2		Skin	1.25	0.159	2.23	0.0425
TRCN0000058974	CCTACTGTCCTACCTGCGGCA	IL11	NM_000641	3589	interleukin 11		Skin	1.16	0.161	2.23	0.0352
TRCN0000058875	CCTTGAGAAAGACAGAGGGAA	IL1F6	NM_014440	27179	interleukin 1 family, member 6 (epsilon)		Skin	1.18	0.162	2.01	0.0429
TRCN0000058216	GCCACAAACCTTCAGGAAATA	IL20	NM_018724	50604	interleukin 20		Skin	1.19	0.162	1.89	0.0479
TRCN0000058207	CCAAGATGCATCTTGCCCACA	LTA	NM_000595	4049	lymphotoxin alpha (TNF superfamily, member 1)		Skin	1.15	0.165	2.38	0.0326
TRCN0000005867	CTTGCAAGAAAGTTTAAGAAG	IFNA2	NM_000605	3440	interferon, alpha 2		Skin	1.22	0.166	1.98	0.0474
TRCN0000414522	GTCGTTGTGTCCCTTCATATT	VEGFC	NM_005429	7424	vascular endothelial growth factor C		Skin	1.25	0.172	2.51	0.0326
TRCN0000058386	CCTGCGTGTTGAAAGATGATA	IL1B	NM_000576	3553	interleukin 1, beta		Skin	1.21	0.186	2.1	0.0433
TRCN0000415644	AGATTCTGGCTAGTGTCTATC	XCL1	NM_002995	6375	chemokine (C motif) ligand 1		Skin	1.21	0.19	2.15	0.0429
TRCN0000331270	CAAGGATTGCGGCGTGGGTTT	MDK	NM_002391	4192	midkine (neurite growth-promoting factor 2)		Skin	1.13	0.192	2.04	0.0429
TRCN0000058187	AGAACACAACTGAGAAGGAAA	IL4	NM_000589	3565	interleukin 4		Skin	1.1	0.195	2.36	0.0326
TRCN0000029636	CGACTTCACTAACTGTGACTT	TSLP	NM_033035	85480	thymic stromal lymphopoietin		Skin	1.12	0.201	2.19	0.0429
TRCN0000058022	AGAAAGTCTGTACCCATCCAA	CCL26	NM_006072	10344	chemokine (C-C motif) ligand 26		Skin	1.07	0.216	2.57	0.0289
TRCN0000058444	GCATTCAAACAGTTGGACGTA	IL24	NM_006850	11009	interleukin 24		Skin	1.06	0.216	2.08	0.0429
TRCN0000058442	GCATACTTCCTAACAGAGGCT	IL1F10	NM_032556	84639	interleukin 1 family, member 10 (theta)		Skin	1.06	0.221	2.04	0.0429
TRCN0000118189	CCTCAGCATGAGAGAATTATT	PDGFC	NM_016205	56034	platelet derived growth factor C		Skin	1.04	0.228	2.03	0.0429
TRCN0000300891	CCTCAGCATGAGAGAATTATT	PDGFC	NM_016205	56034	platelet derived growth factor C		Skin	1.04	0.228	2.03	0.0429
TRCN0000058042	GAATCCAGAATCGAAGGCCAT	CXCL10	NM_001565	3627	chemokine (C-X-C motif) ligand 10		Skin	1.04	0.229	1.95	0.0461
TRCN0000381382	CGGTCATAGCAGCCACCTTCA	CCL2	NM_002982	6347	chemokine (C-C motif) ligand 2		Skin	1.08	0.232	2.77	0.0289
TRCN0000296379	AGAGAGAAGCAGAGACCCACA	PGF	NM_002632	5228	placental growth factor		Skin	1.05	0.235	2.59	0.0289
TRCN0000118191	CCCAGTGATGGAACTATATTA	PDGFC	NM_016205	56034	platelet derived growth factor C		Skin	1.13	0.237	2.14	0.0474
TRCN0000300954	CCCAGTGATGGAACTATATTA	PDGFC	NM_016205	56034	platelet derived growth factor C		Skin	1.13	0.237	2.14	0.0474
TRCN0000010967	CCTTGGTGCTTCTGCACCAAA	IFNW1	NM_002177	3467	interferon, omega 1		Skin	1.05	0.241	2.52	0.0326
TRCN0000371694	CATAAAGCCTTGGATGTATAT	CCL7	NM_006273	6354	chemokine (C-C motif) ligand 7		Skin	1.05	0.264	2.27	0.0429
TRCN0000373795	ATTAAGACACTGATCACTAAA	TNFSF15	NM_005118	9966	tumor necrosis factor (ligand) superfamily, member 15		Skin	1.01	0.269	2.33	0.0425
TRCN0000373680	TTGCTGCCTACGTCCACTTTA	TGFB2	NM_003238	7042	transforming growth factor, beta 2		Skin	0.847	0.331	2.14	0.0429
TRCN0000377734	ATCCCGTGTTCACTCATGAAA	CCL15	NM_032965	6359	chemokine (C-C motif) ligand 15		Skin	0.881	0.35	2.08	0.0474
TRCN0000417360	GGATACAGAAAGGCCCTCAAC	CCL16	NM_004590	6360	chemokine (C-C motif) ligand 16		Skin	0.848	0.357	2.03	0.0474
TRCN0000058583	CCCATGTCACAACAACCTCAT	LIF	NM_002309	3976	leukemia inhibitory factor (cholinergic differentiation factor)		Skin	0.788	0.384	2.06	0.0429
TRCN0000063997	ACAGGCACCAAAGTCCGCCAA	MDK	NM_002391	4192	midkine (neurite growth-promoting factor 2)		Skin	0.659	0.445	1.88	0.0474
TRCN0000059191	ACGACGAAGGAACAGGCGTTT	LTB	NM_002341	4050	lymphotoxin beta (TNF superfamily, member 3)		Skin	0.687	0.447	2.18	0.0429
TRCN0000058003	CGTCTTTGTCACCCGAAAGAA	CCL5	NM_002985	6352	chemokine (C-C motif) ligand 5		Skin	0.64	0.463	2.33	0.0326
TRCN0000282422	TCTCCTGGTACAAGACATAAT	CSF1	NM_000757	1435	colony stimulating factor 1 (macrophage)		Skin	0.631	0.481	1.93	0.0474
TRCN0000378796	CCTTCCAAAGCCAGATCTTAT	IL11	NM_000641	3589	interleukin 11		Skin	0.605	0.485	2.48	0.0289
TRCN0000058441	GAGGATGTGAACATTGAGGAA	IL1F10	NM_032556	84639	interleukin 1 family, member 10 (theta)		Skin	0.515	0.531	1.87	0.0429
TRCN0000057939	GCTGAACAGTGACAAATCCAA	CXCL1	NM_001511	2919	chemokine (C-X-C motif) ligand 1 (melanoma growth stimulating activity, alpha)		Skin	0.552	0.544	2.39	0.0326
TRCN0000056723	GCCAGCTTTGTGTGTGAGTAT	CTLA4	NM_005214	1493	cytotoxic T-lymphocyte-associated protein 4		Skin	0.537	0.554	2.16	0.0425
TRCN0000331252	AGGGAAGGGAAAGGACTAGAC	MDK	NM_002391	4192	midkine (neurite growth-promoting factor 2)		Skin	0.457	0.636	2.09	0.0429
TRCN0000058440	GCAGCCAGTACAGCTCACCAA	IL1F10	NM_032556	84639	interleukin 1 family, member 10 (theta)		Skin	0.377	0.704	2.04	0.0433
TRCN0000226420	AGGTACTGTACAACCATTATA	SOCS5	NM_014011	9655	suppressor of cytokine signaling 5		Skin	0.366	0.707	2.07	0.0429
TRCN0000058544	CTTGAAGACAAGCTGGGTTAA	IL3	NM_000588	3562	interleukin 3 (colony-stimulating factor, multiple)		Skin	0.256	0.792	1.96	0.0429
TRCN0000057887	CGGGAGTTCAGGATTGCATGA	CCL15	NM_004167	6359	chemokine (C-C motif) ligand 15		Skin	0.187	0.859	2	0.0476
TRCN0000058924	CAGTGCTACTTGTGTTTACTT	IL15	NM_000585	3600	interleukin 15		Skin	0.141	0.891	2.34	0.0326
